# Supplementary material for: UPLC-MS-Based Metabolomics Profiling for α-Glucosidase Inhibiting Property of Parkia speciosa Pods
Source: MDPI journal article supplement (doi:10.3390/life11020078), 2021-01-22

**Figure. S1.** MS/MS fragmentations spectra of Gossypetin 8-rhamnoside, Eucommin A, Embelin, and gallic acid

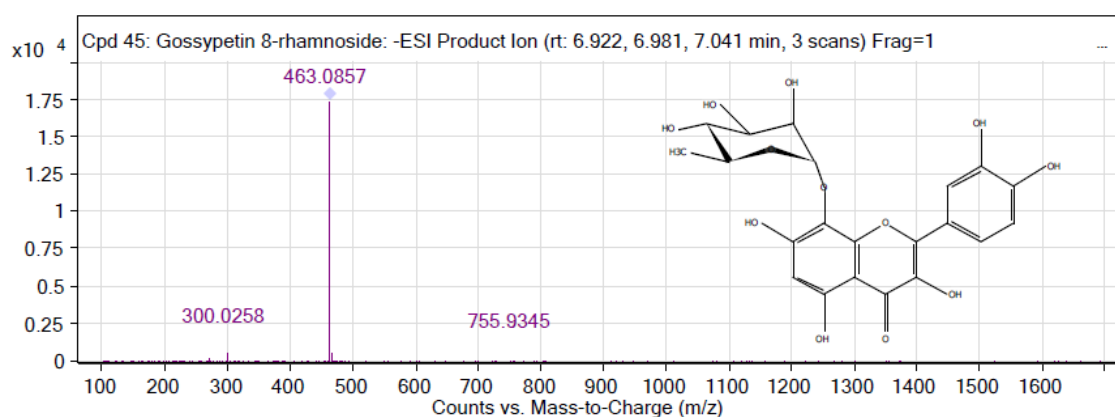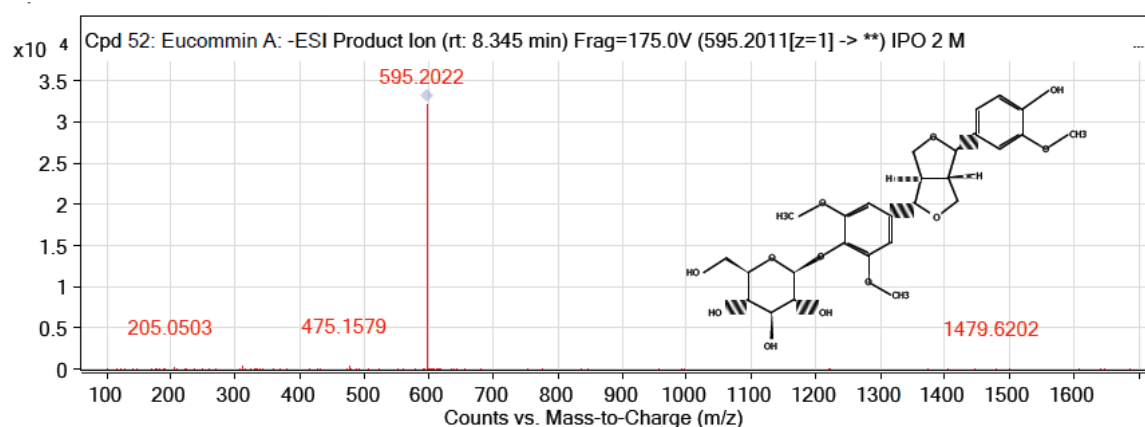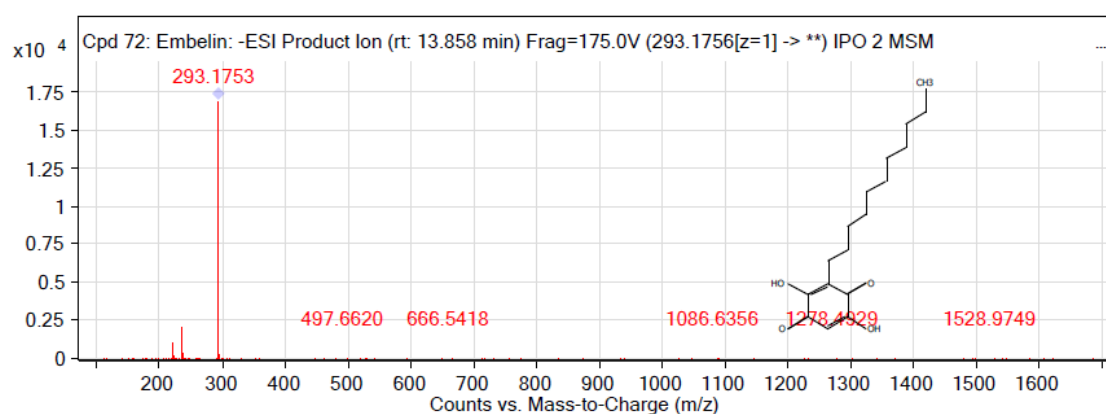

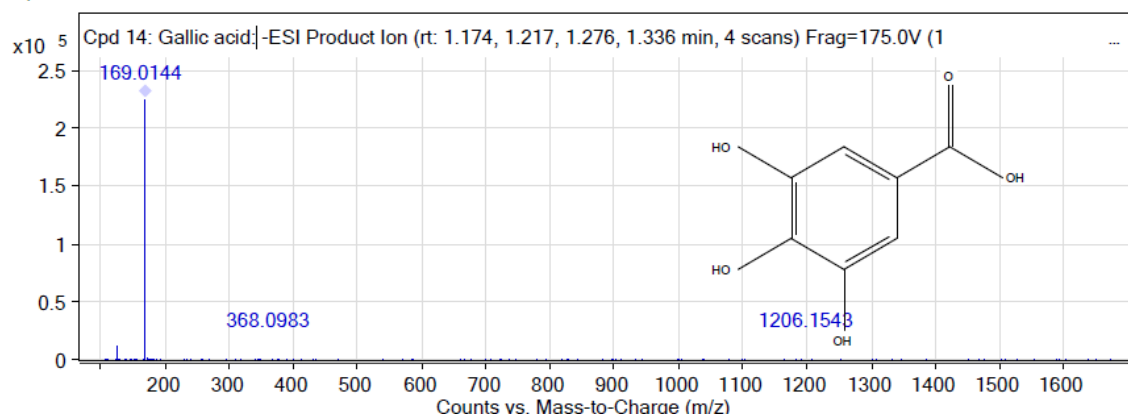

Supplement: s1 [file s1]
